# Supplementary material
Source: PubMed Central journal article supplement (PMC2771775)
Supplement: NIHMS146897-supplement-1_si_001.pdf [file NIHMS146897-supplement-1_si_001.pdf]

**Supplemental Information for**  
**Phage-induced Alignment of Membrane Proteins Enables the**  
**Measurement and Structural Analysis of Residual Dipolar Couplings**  
**with Dipolar Waves and  $\lambda$ -Maps**

Sang Ho Park<sup>1</sup>, Woo Sung Son<sup>1</sup>, Rishi Mukhopadhyay<sup>2</sup>, Homayoun Valafar<sup>2</sup>, and Stanley J. Opella<sup>1\*</sup>

<sup>1</sup>*Department of Chemistry and Biochemistry, University of California, San Diego, 9500 Gilman Drive, La Jolla, California 92093-0307,* <sup>2</sup>*Computer Science and Engineering, Swearingen Engineering Center, University of South Carolina, Columbia, South Carolina 29308*

**Protein sequences**

Pf1: GVIDTSAVES AITDGQGDMK AIGGYIVGAL VILAVAGLIY SMLRKA  
Vpucyto: EYRKILRQRK IDRLIDRLIE RAEDSGNESE GEISALVELG VELGHHPWD VDDL  
MerFt: LIGTTLVALS SFTPVLVILL GVVGLSALTG YLDYVLLPAL AIFIGLTIYA IQRKRQADAS

**NH RDCs of Pf1 coat protein**

**Table S1.** Amide <sup>1</sup>H-<sup>15</sup>N residual dipolar couplings of Pf1 coat protein in 100 mM DHPC, pH 6.7 obtained from stressed polyacrylamide gel and fd bacteriophage induced alignments.

| residue | aa | <sup>1</sup> H- <sup>15</sup> N RDC (Hz) <sup>a</sup> |          |
|---------|----|-------------------------------------------------------|----------|
|         |    | gel                                                   | fd phage |
| 1       | G  | ND <sup>b</sup>                                       | ND       |
| 2       | V  | 2.19                                                  | ND       |
| 3       | I  | 0.90                                                  | -2.38    |
| 4       | D  | 0.31                                                  | -2.96    |
| 5       | T  | -2.46                                                 | 1.53     |
| 6       | S  | -3.68                                                 | 3.45     |
| 7       | A  | -2.09                                                 | 3.56     |
| 8       | V  | -3.49                                                 | 2.36     |
| 9       | E  | -4.00                                                 | 2.25     |
| 10      | S  | -2.88                                                 | 3.69     |
| 11      | A  | -1.84                                                 | 2.85     |
| 12      | I  | -3.51                                                 | 2.88     |
| 13      | T  | -2.52                                                 | 2.56     |
| 14      | D  | -0.05                                                 | 0.26     |
| 15      | G  | 0.12                                                  | 0.85     |
| 16      | Q  | -0.79                                                 | -0.10    |
| 17      | G  | 0.75                                                  | -3.52    |
| 18      | D  | 4.19                                                  | -1.42    |
| 19      | M  | 4.13                                                  | -6.85    |
| 20      | K  | 0.80                                                  | -11.97   |
| 21      | A  | 11.16                                                 | -16.00   |
| 22      | I  | 10.77                                                 | -15.76   |
| 23      | G  | -0.20                                                 | -11.33   |
| 24      | G  | -0.76                                                 | -13.08   |
| 25      | Y  | 14.80                                                 | -22.15   |
| 26      | I  | 3.93                                                  | -15.36   |
| 27      | V  | -4.05                                                 | -10.75   |
| 28      | G  | 5.22                                                  | -18.46   |
| 29      | A  | 13.27                                                 | -22.02   |
| 30      | L  | 1.27                                                  | -12.34   |
| 31      | V  | -1.92                                                 | -13.01   |
| 32      | I  | 11.60                                                 | -21.84   |
| 33      | L  | ND                                                    | -20.29   |
| 34      | A  | -2.37                                                 | -11.35   |
| 35      | V  | 1.63                                                  | -14.91   |
| 36      | A  | 12.20                                                 | -22.36   |
| 37      | G  | 4.84                                                  | -15.74   |
| 38      | L  | -5.35                                                 | -8.96    |
| 39      | I  | 4.98                                                  | -17.78   |
| 40      | Y  | ND                                                    | -20.82   |
| 41      | S  | -4.19                                                 | -10.65   |
| 42      | M  | 10.23                                                 | -9.04    |
| 43      | L  | ND                                                    | -21.03   |
| 44      | R  | -5.53                                                 | -7.30    |
| 45      | K  | 3.29                                                  | 2.53     |
| 46      | A  | 4.15                                                  | ND       |

<sup>a</sup>Estimated average error in the measurements is  $\pm 0.5$  Hz. <sup>b</sup>ND: not determined.

### Experimental Details

We observed 2 Hz -5 Hz splittings of the 2H NMR resonances in the sample solutions containing ca. 20 mg/ml of fd bacteriophage in 100 mM of LMPC, DPC and DHPC at pH 6.5 and 30°C. The splittings decrease somewhat at higher temperatures. We found the fd bacteriophage particles to be stable between pH 6 and 8 in the presence of 100 mM of zwitterionic detergents DHPC, DPC and LMPC; the bacteriophage particles are unstable at lower pH values; they are probably stable at higher pH values but we did not investigate above pH 8. In contrast, fd bacteriophage particles are unstable in anionic detergents such as SDS and LMPG.

### Scalar product between orientations

The scalar product between orientations of the two order tensors S1 and S2 is shown below:

$$S1 \cdot S2 = \begin{bmatrix} -9.016e-01 & 2.786e-01 & 3.309e-01 \\ 3.024e-01 & 9.529e-01 & 2.172e-02 \\ -3.093e-01 & 1.196e-01 & -9.434e-01 \end{bmatrix}$$

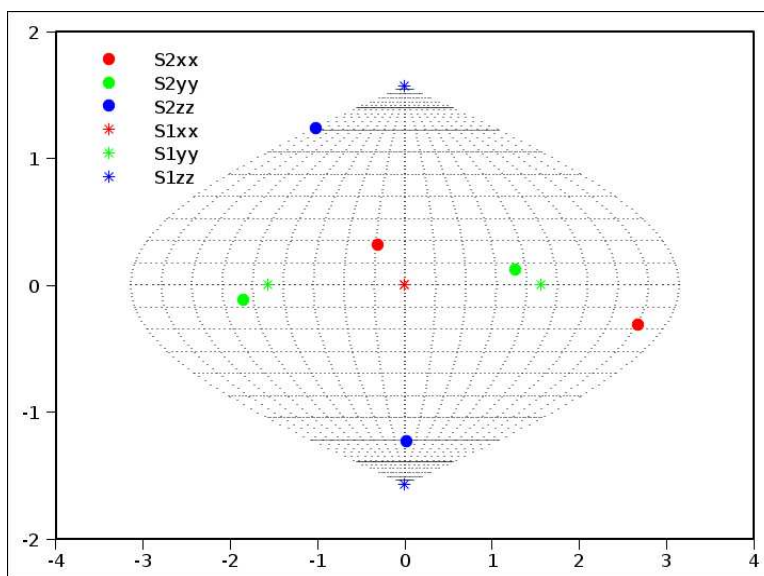

Figure S1. SF-plot visualizes the relative orientation of the two alignment tensors with respect to each other (the information reported by the scalar product matrix above). S1 and S2 refer to the two alignment media. Labels xx, yy and zz refer to the direction of the principal alignments for each of the alignment tensors.
